# Supplementary material for: High-Throughput Sequencing of Diatom Community, Its Spatial and Temporal Variation and Interrelationships with Physicochemical Factors in Danjiangkou Reservoir, China
Source: MDPI journal article supplement (doi:10.3390/w14101609), 2022-05-17
Supplement: s1 [file s1]

**Table S1. Seasonal distribution of genus and species of diatoms in Danjiangkou Reservoir.**

| Number | Genus                            | Species                             | spring | summer | autumn | winter |
|--------|----------------------------------|-------------------------------------|--------|--------|--------|--------|
| 1      | g__Acanthoceras                  | s__Acanthoceras_sp._6vii09-1A       | +      | +      | +      | +      |
| 2      | g__Achnantheidium                | s__Achnantheidium_catenatum         | +      | +      |        |        |
|        |                                  | s__Achnantheidium_pyrenaicum        | +      | +      |        |        |
|        |                                  | s__Achnantheidium_daonense          | +      |        |        |        |
| 3      | g__Actinocyclus_f__Hemidiscaceae | s__Actinocyclus_actinochilus        | +      |        | +      |        |
| 4      | g__Amphora                       | s__Amphora_coffeiformis             |        | +      | +      |        |
| 5      | g__Asterionella                  | s__Asterionella_formosa             | +      | +      | +      |        |
| 6      | g__Aulacoseira                   | s__Aulacoseira_granulata            | +      | +      | +      | +      |
|        |                                  | s__Aulacoseira_subarctica           |        |        |        | +      |
| 7      | g__Caloneis                      | s__Caloneis_fontinalis              |        |        | +      |        |
|        |                                  | s__Caloneis_amphisbaena             |        |        | +      |        |
| 8      | g__Chaetoceros                   | s__Chaetoceros_tenuissimus          |        |        | +      |        |
| 9      | g__Cocconeis                     | s__Cocconeis_placentula             | +      | +      |        | +      |
|        |                                  | s__Cocconeis_pediculus              | +      |        |        | +      |
| 10     | g__Conticribra                   | s__Conticribra_weissflogiopsis      |        |        | +      |        |
| 11     | g__Craticula                     | s__Craticula_cf._cuspidata_KEL-2015 | +      |        |        |        |
|        |                                  | s__Craticula_accomoda               |        | +      | +      |        |
| 12     | g__Cyclotella                    | s__Cyclotella_meneghiniana          | +      | +      |        | +      |
|        |                                  | s__Cyclotella_cf._ocellata          | +      |        |        |        |
|        |                                  | s__Cyclotella_cryptica              | +      |        |        |        |
| 13     | g__Cylindrotheca                 | s__Cylindrotheca_gracilis           | +      |        |        |        |
|        |                                  | s__Cylindrotheca_closterium         |        |        | +      |        |
| 14     | g__Cymatopleura                  | s__Cymatopleura_solea               |        |        | +      |        |
| 15     | g__Cymbella                      | s__Cymbella_affinis                 | +      | +      |        |        |
|        |                                  | s__Cymbella_heterogibbosa           | +      | +      | +      |        |
| 16     | g__Cymbopleura                   | s__Cymbopleura_naviculiformis       |        |        |        | +      |
| 17     | g__Diploneis                     | s__Diploneis_sp.                    | +      |        |        | +      |
| 18     | g__Discostella                   | s__Discostella_woltereckii          | +      | +      | +      | +      |
|        |                                  | s__Discostella_nipponica            | +      | +      | +      | +      |
|        |                                  | s__Discostella_sp._HYK0210-A2       |        | +      |        |        |
| 19     | g__Encyonema                     | s__Encyonema_silesacum              |        | +      |        | +      |
| 20     | g__Encyonopsis                   | s__Encyonopsis_sp._TN-2014          | +      | +      | +      |        |
| 21     | g__Entomoneis                    | s__Entomoneis_paludosa              | +      |        |        |        |
| 22     | g__Epithemia                     | s__Epithemia_contorta               |        | +      | +      |        |
| 23     | g__Fistulifera                   | s__Fistulifera_saprophila           |        | +      |        |        |
| 24     | g__Fragilaria                    | s__Fragilaria_nanana                | +      |        | +      |        |
|        |                                  | s__Fragilaria_bidens                | +      |        | +      | +      |
|        |                                  | s__Fragilaria_famelica              | +      |        |        |        |
|        |                                  | s__Fragilaria_sp._AT-124.05b        | +      |        |        |        |
|        |                                  | s__Fragilaria_crotonensis           |        | +      |        | +      |
|        |                                  | s__Fragilaria_perminuta             |        |        | +      |        |

|    |                                |                                 |   |   |   |   |
|----|--------------------------------|---------------------------------|---|---|---|---|
| 25 | g__Fragilariopsis              |                                 |   |   |   |   |
|    |                                | s__Fragilariopsis_cylindrus     | + |   |   |   |
| 26 | g__Gomphonema                  |                                 |   |   |   |   |
|    |                                | s__Gomphonema_angustum          | + | + |   | + |
|    |                                | s__Gomphonema_parvulum          | + | + | + |   |
| 27 | g__Grammatophora               |                                 |   |   |   |   |
|    |                                | s__Grammatophora_sp._B_LG-2014  |   |   |   | + |
| 28 | g__Gyrosigma                   |                                 |   |   |   |   |
|    |                                | s__Gyrosigma_limosum            |   | + | + |   |
| 29 | g__Halamphora                  |                                 |   |   |   |   |
|    |                                | s__Halamphora_catenulafalsa     | + |   |   |   |
|    |                                | s__Halamphora_montana           |   | + | + |   |
| 30 | g__Hantzschia                  |                                 |   |   |   |   |
|    |                                | s__Hantzschia_sp._LFS-2014      |   | + |   |   |
|    |                                | s__Hantzschia_amphioxys         |   |   |   | + |
| 31 | g__Licmophora                  |                                 |   |   |   |   |
|    |                                | s__Licmophora_flabellata        |   |   | + |   |
| 32 | g__Melosira                    |                                 |   |   |   |   |
|    |                                | s__Melosira_varians             | + | + | + | + |
| 33 | g__Navicula                    |                                 |   |   |   |   |
|    |                                | s__Navicula_sp.                 | + | + | + |   |
|    |                                | s__Navicula_cari                | + |   |   |   |
|    |                                | s__Navicula_cincta              |   | + | + |   |
|    |                                | s__Navicula_sp._AT-201Gel01     | + | + | + |   |
|    |                                | s__Navicula_cryptocephala       |   |   | + | + |
| 34 | g__Nitzschia_f__Bacillariaceae |                                 |   |   |   |   |
|    |                                | s__Nitzschia_linearis           | + |   |   |   |
|    |                                | s__Nitzschia_cf._pusilla        | + |   | + |   |
|    |                                | s__Nitzschia_supralitorea       | + | + | + |   |
|    |                                | s__Nitzschia_dubiiiformis       | + |   |   |   |
|    |                                | s__Nitzschia_palea              | + | + | + |   |
|    |                                | s__Nitzschia_draveillensis      | + |   |   |   |
|    |                                | s__Nitzschia_amphibia           |   | + |   |   |
|    |                                | s__Nitzschia_acidoclinata       |   | + |   |   |
|    |                                | s__Nitzschia_bizertensis        |   |   | + |   |
|    |                                | s__Nitzschia_pusilla            |   |   | + |   |
|    |                                | s__Nitzschia_dissipata          |   |   | + |   |
| 35 | g__Nupela                      |                                 |   |   |   |   |
|    |                                | s__Nupela_sp._NA-2016a          | + |   |   |   |
| 36 | g__Pauliella                   |                                 |   |   |   |   |
|    |                                | s__Pauliella_taeiniata          | + |   |   |   |
| 37 | g__Pinnularia                  |                                 |   |   |   |   |
|    |                                | s__Pinnularia_sp._NE-L29        | + |   |   |   |
|    |                                | s__Pinnularia_sp._NE-L26        |   | + |   |   |
| 38 | g__Pleurosigma                 |                                 |   |   |   |   |
|    |                                | s__Pleurosigma_intermedium      |   |   | + |   |
| 39 | g__Prestauroneis               |                                 |   |   |   |   |
|    |                                | s__Prestauroneis_integra        | + | + | + |   |
| 40 | g__Pseudo-nitzschia            |                                 |   |   |   |   |
|    |                                | s__Pseudo-nitzschia_fraudulenta |   |   | + |   |
| 41 | g__Sellaphora                  |                                 |   |   |   |   |
|    |                                | s__Sellaphora_seminulum         |   |   | + |   |
|    |                                | s__Sellaphora_pupula            |   |   |   | + |
| 42 | g__Skeletonema                 |                                 |   |   |   |   |
|    |                                | s__Skeletonema_grevillei        | + |   |   |   |
|    |                                | s__Skeletonema_potamos          | + |   | + |   |
|    |                                | s__Skeletonema_costatum         | + |   | + | + |
| 43 | g__Stephanodiscus              |                                 |   |   |   |   |
|    |                                | s__Stephanodiscus_cf._akanensis | + |   | + |   |
|    |                                | s__Stephanodiscus_suzukii       |   |   |   | + |
| 44 | g__Surirella                   |                                 |   |   |   |   |
|    |                                | s__Surirella_sp.                | + | + |   |   |
|    |                                | s__Surirella_angusta            |   |   | + |   |
|    |                                | s__Surirella_biseriata          |   |   | + | + |
|    |                                | s__Surirella_sp._heteropolar    |   |   |   | + |
| 45 | g__Synedra                     |                                 |   |   |   |   |
|    |                                | s__Synedra_ulna                 |   | + | + |   |
| 46 | g__Tabularia                   |                                 |   |   |   |   |
|    |                                | s__Tabularia_fasciculata        |   |   |   | + |

|    |                                      |                                      |   |   |   |   |
|----|--------------------------------------|--------------------------------------|---|---|---|---|
| 47 | g__Thalassiosira                     | s__Thalassiosira_weissflogii         | + |   |   |   |
|    |                                      | s__Thalassiosira_gessneri            |   |   | + |   |
| 48 | g__unclassified_c__Bacillariophyceae | s__uncultured_Bacillariophyceae      | + | + | + | + |
|    |                                      | s__Bacillariophyceae_sp._YS-2016a    |   |   | + |   |
| 49 | g__unclassified_c__Mediophyceae      | s__uncultured_Mediophyceae           |   |   | + | + |
| 50 | g__unclassified_p__Bacillariophyta   | s__uncultured_diatom                 | + | + | + | + |
|    |                                      | s__Peridiniopsis_jiulongensis_diatom | + |   | + | + |
|    |                                      | _endosymbiont                        |   |   |   |   |
| 51 | g__Urosolenia                        | s__Urosolenia_eriensis               | + | + |   |   |

---
